# Supplementary material
Source: PubMed Central journal article supplement (PMC7335785)
Supplement: supp_RA120.012624_158196_2_supp_520061_q9hkqb.pdf [file supp_RA120.012624_158196_2_supp_520061_q9hkqb.pdf]

## Supporting information

### The interaction of the mitochondrial protein importer TOMM34 with HSP70 is regulated by TOMM34 phosphorylation and binding to 14-3-3 adaptors

Filip Trcka<sup>1</sup>, Michal Durech<sup>1</sup>, Pavla Vankova<sup>2,3</sup>, Veronika Vandova<sup>1</sup>, Oliver Simoncik<sup>1</sup>, Daniel Kavan<sup>2,3</sup>, Borivoj Vojtesek<sup>1</sup>, Petr Muller<sup>1\*</sup>, Petr Man<sup>2\*</sup>

<sup>1</sup>Regional Centre for Applied Molecular Oncology, Masaryk Memorial Cancer Institute, Zluty kopec 7, 656 53 Brno, Czech Republic

<sup>2</sup>BioCeV - Institute of Microbiology of the Czech Academy of Sciences, v.v.i., Prumyslova 595, 252 50 Vestec, Czech Republic

<sup>3</sup>Department of Biochemistry, Faculty of Science, Charles University, Hlavova 8, 128 43 Prague, Czech Republic

#### Supplementary tables and figures:

**Supplementary table S1.** Vectors for expression of 14-3-3 proteins and protein sequences of 14-3-3 isoforms used in this study.

**Supplementary table S2.** NetPhos 3.1 prediction of kinase target sites in TOMM34 protein sequence.

**Supplementary table S3.** Efficacy of PKA-mediated phosphorylation of TOMM34 residues.

**Supplementary table S4.** 14-3-3 Pred prediction of 14-3-3 binding sites in TOMM34 protein sequence.

**Supplementary figure S1.** Analysis of selected SEC fractions by Coomassie staining.

**Supplementary figure S2.** Native ESI-MS spectra of 14-3-3 $\gamma$ , unmodified TOMM34, PKA-phosphorylated TOMM34 and their mixtures.

**Supplementary figure S3.** The effect of point mutations on TOMM34 secondary structure.

**Supplementary figure S4.** Peptide-induced structural changes in phosphorylated and 14-3-3 $\gamma$ -bound TOMM34.

**Supplementary figure S5.** Chemical cross-linking of pTOMM34·14-3-3 $\gamma$  complexes.

**Supplementary figure S6.** The effect of 14-3-3 $\gamma$  dimer concentration on HSP70/HSP40/BAG1-mediated refolding of heat-denatured fire fly luciferase.

## Supplementary table S1.

### pET21-14-3-3 $\beta$

MTMDKSELVQKAKLAEQAERYDDMAAAMKAVTEQGHLSNEERNLLSVAYKNVVGARRSSWRVISSIEQK  
TERNEKKQQMGKEYREKIEAELQDICNDVLELLDKYLIPNATQPESKVFYLMKMGDYFRYLSEVASGDNK  
QTTVSNSQQAYQEAFAEISKKEMQPTHPIRLGLALNFSVFYYEILNSPEKACSLAKTAFDEAIAELDTLNE  
ESYKDSTLIMQLLRDNLTLWTSENQGDGENLYFQSLEHHHHHH

### pET21-14-3-3 $\gamma$

MVDREQLVQKARLAEQAERYDDMAAAMKNVTELNEPLSNEERNLLSVAYKNVVGARRSSWRVISSIEQKT  
SADGNEKKIEMVRAYREKIEKELEAVCQDVLSLLDNYLIKNCSETQYESKVFYLMKMGDYRYLAEVATG  
EKRA TVVESSEKAYSEAHEISKEHMQPTHPIRLGLALNYSVFYYEIQNAPEQACHLAKTAFDDAIAELDT  
LNEDSYKDSTLIMQLLRDNLTLWTS DQDDGGEGNNENLYFQSLEHHHHHH

### pDEST17-HIS-14-3-3 $\epsilon$

MSYYHHHHHLESTSLYKKAGFEGDRTMDDREDLVYQAKLAEQAERYDEMVESMCKVAGMDVELTVEERN  
LLSVAYKNVIGARRASWRIISSIEQKEENKGGEDKLMIREYRQM VETELKLCDDILDVLDKHLIPAAN  
TGESKVFYMKMGDYHRYLAEFATGNDRKEAAENSLVAYKAASDIAMTELPPTHPIRLGLALNFSVFYYE  
ILNSPDRACRLAKAAFD AIAELDTLSEESYKDSTLIMQLLRDNLTLWTS DMQGDGEEQNKEALQDVEDE  
NQ

### pNIC28-Bsa4-14-3-3 $\sigma$

MHHHHHSSGRENLYFQGHMERASLIQKAKLAEQAERYEDMAAFMKGAVEKGEELSCEERNLLSVAYKNV  
VGGQRAAWRVLSSIEQKSNEEGSEEKGPEVREYREK VETELQGVCDTVLGLLD SHLIKEAGDAESRVFYL  
KMGDYRYLAEVATGDDKKRIIDSARSAYQEAMDISKKEMPTNP IRLGLALNFSVFHYEIANSP EAI  
SLAKTTFDEAMADLHTLSEDSYKDSTLIMQLLRDNLTLWT

### pDEST17-HIS-14-3-3 $\tau$

MSYYHHHHHLESTSLYKKAGFEGDRTMEKTELIQKAKLAEQAERYDDMATCMKAVTEQGAELSNEERNL  
LSVAYKNVVGRRSAWRVISSIEQKTDTS DKKLQLIKDYREKVESELRSICTTVLELLDKYLIANATNPE  
SKVFYLMKMGDYFRYLAEVACGDDRKQTIDNSQ GAYQEAFDISKKEMQPTHPIRLGLALNFSVFYYEILN  
NPELACTLAKTAFDEAIAELDTLNEDSYKDSTLIMQLLRDNLTLWTS DSAGEECDAAEGAEN

### pDEST17-HIS-14-3-3 $\zeta$

MSYYHHHHHLESTSLYKKAGFEGDRTMDKNELVQKAKLAEQAERYDDMAACMKS VTEQGAELSNEERNL  
LSVAYKNVVGARRSSWRVVSSIEQKTEGA EKKQMAREYREKIETELRDICNDVLSLLEKFLIPNASQAE  
SKVFYLMKMGDYRYLAEVAAGDDKGI VDSQQAYQEAFAEISKKEMQPTHPIRLGLALNFSVFYYEILN  
SPEKACSLAKTAFDEAIAELDTLSEESYKDSTLIMQLLRDNLTLWTS DTQGDEAEAGEGGEN

**Supplementary table S1.** Vectors for expression of 14-3-3 proteins and protein sequences of 14-3-3 isoforms used in this study. Sequences highlighted in blue represent tag sequences.

## Supplementary table S2.

| Sequence                    | #          | x        | Context          | Kinase     | Answer     | Score        |
|-----------------------------|------------|----------|------------------|------------|------------|--------------|
| >sp_Q15785_TOM34_HUMA       | 309        |          | amino acids      |            |            |              |
| sp_Q15785_TOM34_HUMA        | 8          | S        | KFPDSVEEL        | unsp       | YES        | 0,998        |
| sp_Q15785_TOM34_HUMA        | 93         | S        | LRRASAYEA        | unsp       | YES        | 0,997        |
| sp_Q15785_TOM34_HUMA        | 186        | S        | NRVPSAGDV        | unsp       | YES        | 0,997        |
| sp_Q15785_TOM34_HUMA        | 174        | S        | AKSKSKETT        | unsp       | YES        | 0,994        |
| sp_Q15785_TOM34_HUMA        | 172        | S        | EMAKSKSKE        | unsp       | YES        | 0,939        |
| sp_Q15785_TOM34_HUMA        | 84         | S        | LVPFSIKPL        | unsp       | YES        | 0,897        |
| sp_Q15785_TOM34_HUMA        | 120        | S        | DNVTSAVEG        | unsp       | YES        | 0,883        |
| sp_Q15785_TOM34_HUMA        | 25         | Y        | RNGQYAEAS        | unsp       | YES        | 0,878        |
| sp_Q15785_TOM34_HUMA        | 230        | Y        | ESATYSNRA        | unsp       | YES        | 0,842        |
| <b>sp_Q15785_TOM34_HUMA</b> | <b>93</b>  | <b>S</b> | <b>LRRASAYEA</b> | <b>PKA</b> | <b>YES</b> | <b>0,827</b> |
| <b>sp_Q15785_TOM34_HUMA</b> | <b>160</b> | <b>S</b> | <b>KRWNSLPSE</b> | <b>PKA</b> | <b>YES</b> | <b>0,826</b> |
| sp_Q15785_TOM34_HUMA        | 180        | T        | ETTATKNRV        | PKC        | YES        | 0,82         |
| sp_Q15785_TOM34_HUMA        | 54         | Y        | ESVLYSNRA        | unsp       | YES        | 0,819        |
| sp_Q15785_TOM34_HUMA        | 55         | S        | SVLYSNRAA        | PKC        | YES        | 0,767        |
| sp_Q15785_TOM34_HUMA        | 280        | S        | DYKSSFADI        | unsp       | YES        | 0,749        |
| sp_Q15785_TOM34_HUMA        | 45         | S        | AQGSSDPEE        | unsp       | YES        | 0,744        |
| sp_Q15785_TOM34_HUMA        | 45         | S        | AQGSSDPEE        | CKII       | YES        | 0,707        |
| sp_Q15785_TOM34_HUMA        | 172        | S        | EMAKSKSKE        | PKC        | YES        | 0,678        |
| sp_Q15785_TOM34_HUMA        | 129        | T        | INRMTRALM        | PKA        | YES        | 0,66         |
| sp_Q15785_TOM34_HUMA        | 280        | S        | DYKSSFADI        | PKC        | YES        | 0,637        |
| sp_Q15785_TOM34_HUMA        | 146        | S        | LKLPSIPLV        | PKA        | YES        | 0,619        |
| sp_Q15785_TOM34_HUMA        | 160        | S        | KRWNSLPSE        | DNAPK      | YES        | 0,616        |
| sp_Q15785_TOM34_HUMA        | 93         | S        | LRRASAYEA        | PKG        | YES        | 0,614        |
| sp_Q15785_TOM34_HUMA        | 44         | S        | QAQGSSDPE        | CKII       | YES        | 0,611        |
| sp_Q15785_TOM34_HUMA        | 231        | S        | SATYSNRAL        | PKC        | YES        | 0,592        |
| sp_Q15785_TOM34_HUMA        | 44         | S        | QAQGSSDPE        | cdc2       | YES        | 0,587        |
| sp_Q15785_TOM34_HUMA        | 45         | S        | AQGSSDPEE        | cdc2       | YES        | 0,584        |
| sp_Q15785_TOM34_HUMA        | 120        | S        | DNVTSAVEG        | CKII       | YES        | 0,565        |
| sp_Q15785_TOM34_HUMA        | 177        | T        | KSKETTATK        | PKC        | YES        | 0,564        |
| sp_Q15785_TOM34_HUMA        | 29         | S        | YAEASALYG        | cdc2       | YES        | 0,561        |
| sp_Q15785_TOM34_HUMA        | 105        | Y        | YPMAYVDYK        | unsp       | YES        | 0,558        |
| sp_Q15785_TOM34_HUMA        | 19         | S        | AGNESFRNG        | unsp       | YES        | 0,556        |
| sp_Q15785_TOM34_HUMA        | 223        | S        | SLLCNLES         | CKII       | YES        | 0,556        |
| sp_Q15785_TOM34_HUMA        | 119        | T        | DDNVTSAVE        | CKII       | YES        | 0,541        |
| sp_Q15785_TOM34_HUMA        | 186        | S        | NRVPSAGDV        | PKA        | YES        | 0,541        |
| sp_Q15785_TOM34_HUMA        | 95         | Y        | RASAYEALE        | unsp       | YES        | 0,534        |
| sp_Q15785_TOM34_HUMA        | 265        | Y        | VKAFYRRAQ        | EGFR       | YES        | 0,534        |
| sp_Q15785_TOM34_HUMA        | 25         | Y        | RNGQYAEAS        | EGFR       | YES        | 0,53         |

**Supplementary table S2.** NetPhos 3.1 prediction (1) of kinase target sites in TOMM34 protein sequence. PKA-targeted Ser<sup>93</sup> and Ser<sup>160</sup> residues are highlighted.

### Supplementary table S3.

a

|      |                    | TOMM34 protein form |      |       |            |
|------|--------------------|---------------------|------|-------|------------|
|      |                    | WT                  | S93A | S160A | S93A/S160A |
| site | Ser <sup>-1</sup>  | 3%                  | 2%   | 3%    | 2%         |
|      | Ser <sup>93</sup>  | 94%                 | N/A  | 97%   | N/A        |
|      | Ser <sup>146</sup> | 4%                  | 1%   | 3%    | 2%         |
|      | Ser <sup>160</sup> | 65%                 | 58%  | N/A   | N/A        |
|      | Ser <sup>186</sup> | 8%                  | 6%   | 7%    | 6%         |
|      | Ser <sup>280</sup> | 24%                 | 17%  | 30%   | 24%        |

b

|          |                    | TOMM34 protein form |         |         |         |         |         |            |         |
|----------|--------------------|---------------------|---------|---------|---------|---------|---------|------------|---------|
|          |                    | WT                  |         | S93A    |         | S160A   |         | S93A/S160A |         |
| fraction |                    | 12.8 ml             | 14.3 ml | 12.8 ml | 14.3 ml | 12.8 ml | 14.3 ml | 12.8 ml    | 14.3 ml |
| site     | Ser <sup>93</sup>  | 98%                 | 93%     | -       | -       | 98%     | 96%     | -          | -       |
|          | Ser <sup>160</sup> | 99%                 | 7%      | 98%     | 9%      | -       | -       | -          | -       |

**Supplementary table S3.** Efficacy of PKA-mediated phosphorylation of TOMM34 residues. (a) The table summarizes phosphorylation levels at PKA-targeted TOMM34 residues inferred from extracted ion chromatograms corresponding to non- and phosphorylated peptide variants. (b) The same approach was used to estimate the levels of Ser<sup>93</sup> and Ser<sup>160</sup> residues phosphorylation in 14-3-3 $\gamma$ -bound (elution volume 12.8 ml) and unbound (elution volume 14.3 ml) SEC fractions (see Figure 3).

### Supplementary table S4.

| Site       | Peptide_ <sub>[-6:4]</sub> | ANN         | PSSM        | SVM         | consensus,pSer/Thr |
|------------|----------------------------|-------------|-------------|-------------|--------------------|
| <b>160</b> | <b>AQKRWNsLPSE</b>         | <b>0,93</b> | <b>1,44</b> | <b>1,49</b> | <b>1,28</b>        |
| <b>93</b>  | <b>PLLRRAAsAYEA</b>        | <b>0,91</b> | <b>1,20</b> | <b>1,05</b> | <b>1,05</b>        |
| 186        | TKNRVPsAGDV                | 0,85        | 0,96        | 0,38        | 0,73               |
| 279        | ALKDYKsSFAD                | 0,63        | 0,22        | 0,16        | 0,34               |
| 174        | EMAKSKsKETT                | 0,40        | 0,30        | 0,15        | 0,29               |
| 146        | WRLKLPsIPLV                | 0,59        | 0,58        | 0,01        | 0,39               |
| 45         | LQAQGSsDPEE                | 0,37        | 0,32        | -0,12       | 0,19               |
| 76         | CIKDCtALAL                 | 0,50        | 0,28        | -0,14       | 0,21               |
| 219        | IEKYSEsLLCS                | 0,48        | 0,27        | -0,14       | 0,20               |
| 172        | HKEMAKsKSKE                | 0,39        | 0,05        | -0,16       | 0,09               |
| 280        | LKDYKsFADI                 | 0,33        | 0,05        | -0,24       | 0,05               |
| 110        | AYVDYKtVLQI                | 0,39        | 0,08        | -0,38       | 0,03               |
| 135        | TRALMDsLGPE                | 0,35        | 0,07        | -0,41       | 0,00               |
| 129        | EGINRMtRALM                | 0,19        | 0,10        | -0,55       | -0,09              |
| 244        | LVLKQYtEAVK                | 0,18        | 0,08        | -0,58       | -0,10              |
| 19         | RAAGNEsFRNG                | 0,30        | -0,04       | -0,65       | -0,13              |
| 231        | LESATYsNRAL                | 0,14        | -0,01       | -0,76       | -0,21              |
| 153        | IPLVPVsAQKR                | 0,19        | -0,15       | -0,79       | -0,25              |
| 178        | SKSKETtATKN                | 0,35        | -0,01       | -0,90       | -0,19              |
| 180        | SKETTAtKNRV                | 0,28        | -0,04       | -0,90       | -0,22              |
| 251        | EAVKDCtEALK                | 0,23        | -0,08       | -0,91       | -0,25              |
| 8          | APKFPDsVEEL                | 0,19        | -0,15       | -0,93       | -0,29              |
| 119        | QIDDNVtSAVE                | 0,20        | -0,10       | -0,96       | -0,29              |
| 120        | IDDNVTsAVEG                | 0,15        | -0,12       | -0,96       | -0,31              |
| 75         | DCIKDCtSALA                | 0,36        | -0,04       | -1,00       | -0,23              |
| 84         | LALVPFsIKPL                | 0,05        | -0,24       | -1,00       | -0,40              |
| 163        | RWNSLPsENHK                | 0,12        | -0,15       | -1,04       | -0,35              |
| 229        | SNLEsATYS                  | 0,11        | -0,02       | -1,10       | -0,33              |
| 44         | VLQAQGsSDPE                | 0,13        | -0,14       | -1,13       | -0,38              |
| 55         | EESVLYsNRAA                | 0,08        | -0,16       | -1,15       | -0,41              |
| 29         | GQYAEAsALYG                | 0,16        | -0,08       | -1,18       | -0,36              |
| 217        | KAIEKYsESLL                | 0,06        | -0,02       | -1,23       | -0,40              |
| 227        | LCSNLEsATYS                | 0,10        | -0,17       | -1,49       | -0,52              |
| 177        | KSKSKEtTATK                | 0,07        | -0,41       | -1,49       | -0,61              |
| 285        | SSFADIsNLLQ                | 0,07        | -0,32       | -1,66       | -0,64              |
| 223        | SESLLCsNLES                | 0,07        | -0,26       | -2,02       | -0,74              |
| 51         | SDPEEEsVLYS                | 0,02        | -0,44       | -2,43       | -0,95              |

**Supplementary table S4.** 14-3-3 Pred (2) prediction of 14-3-3 binding sites in TOMM34 protein sequence. PKA-targeted Ser<sup>93</sup> and Ser<sup>160</sup> residues are highlighted.

**Supplementary figure S1.**

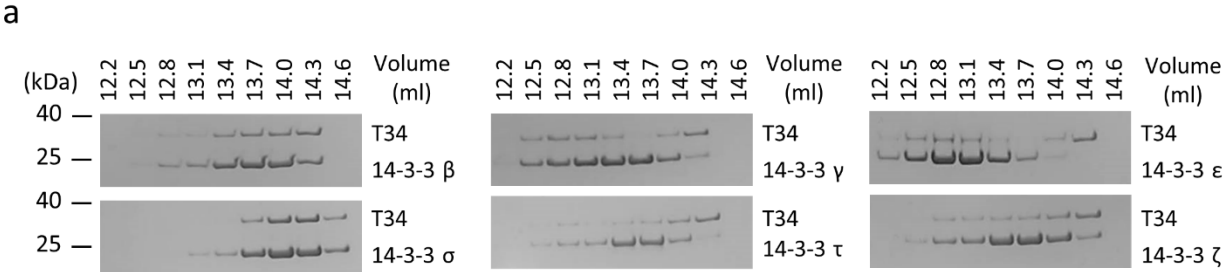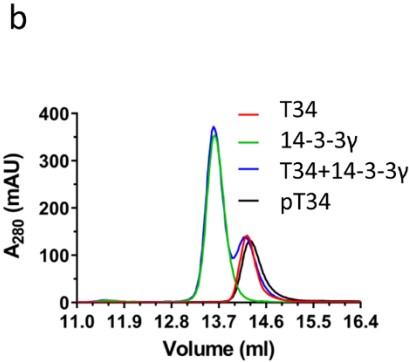

**Supplementary figure S1.** (a) Indicated fractions from Figure 2 were analyzed by gel electrophoresis and Coomassie staining. (b) SEC analysis of non-phosphorylated TOMM34 (35  $\mu$ M) in a mixture with 14-3-3 $\gamma$  isoform (70  $\mu$ M).

Supplementary figure S2.

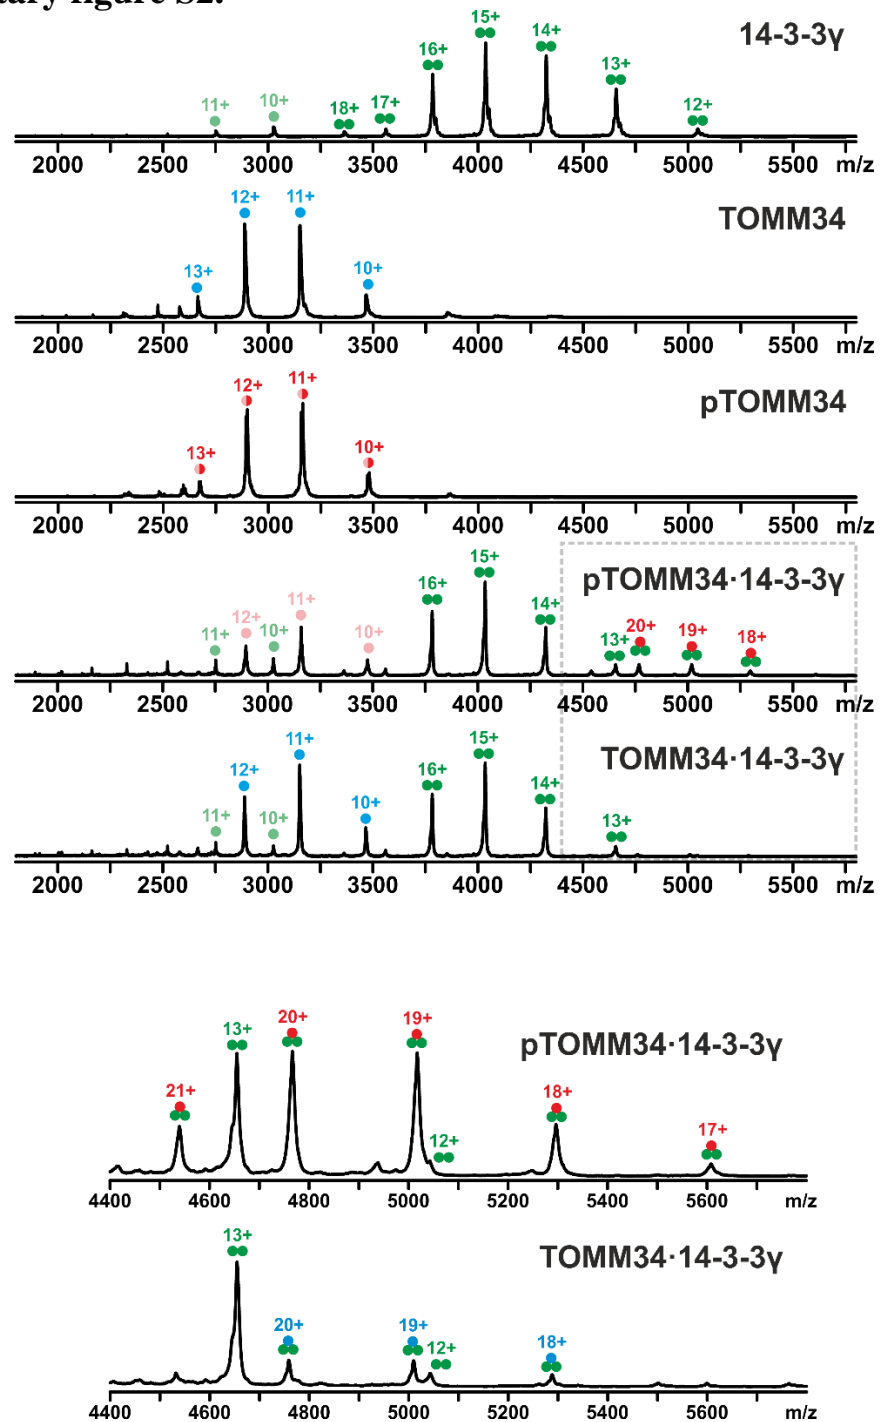

**Supplementary figure S2.** Native ESI-MS spectra of 14-3-3 $\gamma$  (green), unmodified TOMM34 (blue), PKA-phosphorylated pTOMM34 (red) and their mixtures. The charged states corresponding to monomers and dimers are labelled with single and double dots, respectively. Grey dashed box represents magnification of spectra belonging to a tripartite complex of 14-3-3 $\gamma$  dimer with phosphorylated TOMM34. Halved dots in native ESI-MS spectrum for pTOMM34 mirror the presence of single (pSer<sup>93</sup>) and doubly phosphorylated protein (pSer<sup>93</sup>/pSer<sup>160</sup>, see Figure 1B).

### Supplementary figure S3.

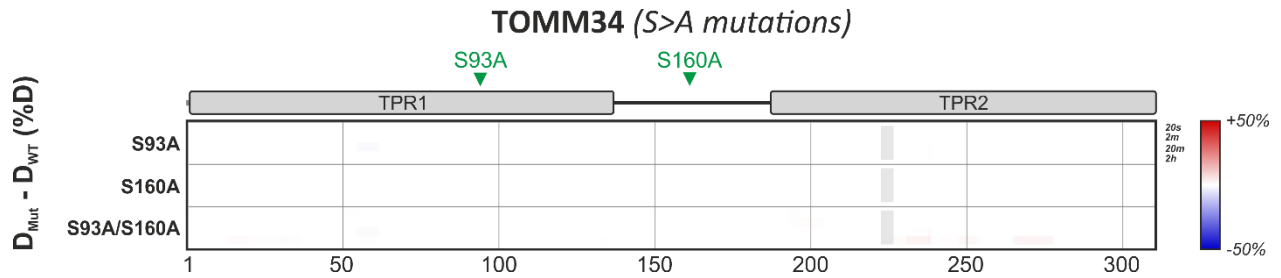

**Supplementary figure S3.** Time resolved deuteration level differences between TOMM34 WT and S93A, S160A and S93A/S160A mutant forms (indicated on the left side) presented in the form of heat maps. Horizontal grey lines separate individual experimental conditions. Within each experimental conditions, four lines are corresponding to exchange times (20 sec, 2 min, 20 min, 2 h, from top to bottom) – indicated on the right side. Vertical grey lines mark sequence positions (spaced by 50 amino acids). TOMM34 domain structure is depicted above the heat-map with mutations indicated by arrowheads. Regions in grey boxes were not covered during peptide mapping.



## Supplementary figure S4.

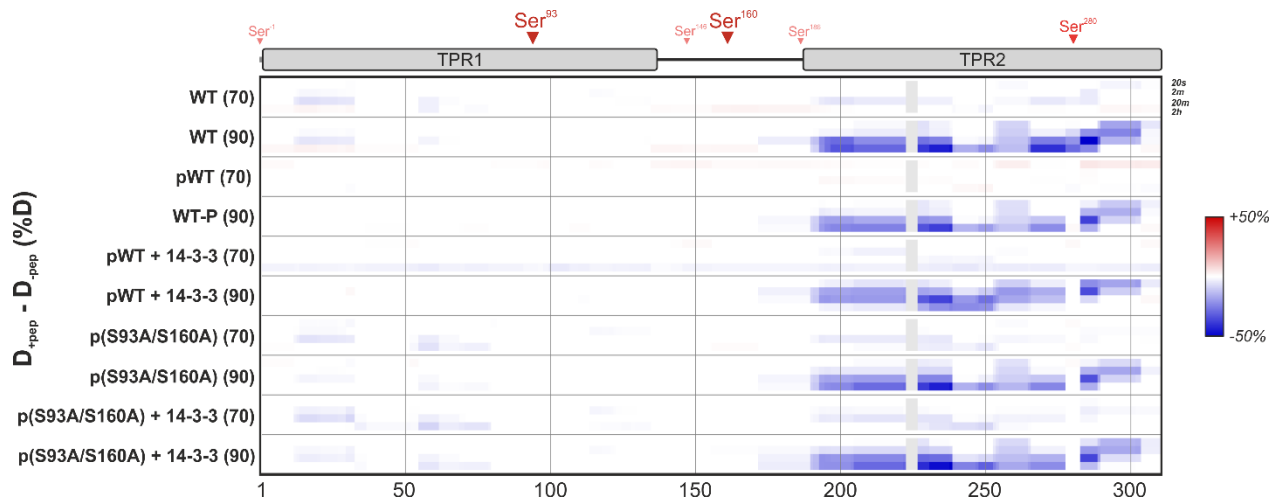

**Supplementary figure S4.** Time resolved deuteration level differences between non-phosphorylated/PKA-phosphorylated (p) TOMM34 WT and S93A/S160A proteins detected in the presence of HSP70 (70) and HSP90 (90) C-terminal peptides and in the peptides absence. The effect of 14-3-3 $\gamma$  presence on peptide-induced deuteration changes is also shown. Horizontal grey lines separate individual experimental conditions. Within each experimental conditions, four lines are corresponding to exchange times (20 sec, 2 min, 20 min, 2 h, from top to bottom) – indicated on the right side. Vertical grey lines mark sequence positions (spaced by 50 amino acids). TOMM34 domain structure is depicted above the heat-map with PKA-modified sites (see Figure 1 and Supplementary table S3) indicated by arrowheads. Regions in grey boxes were not covered during peptide mapping.

**Supplementary figure S5.**

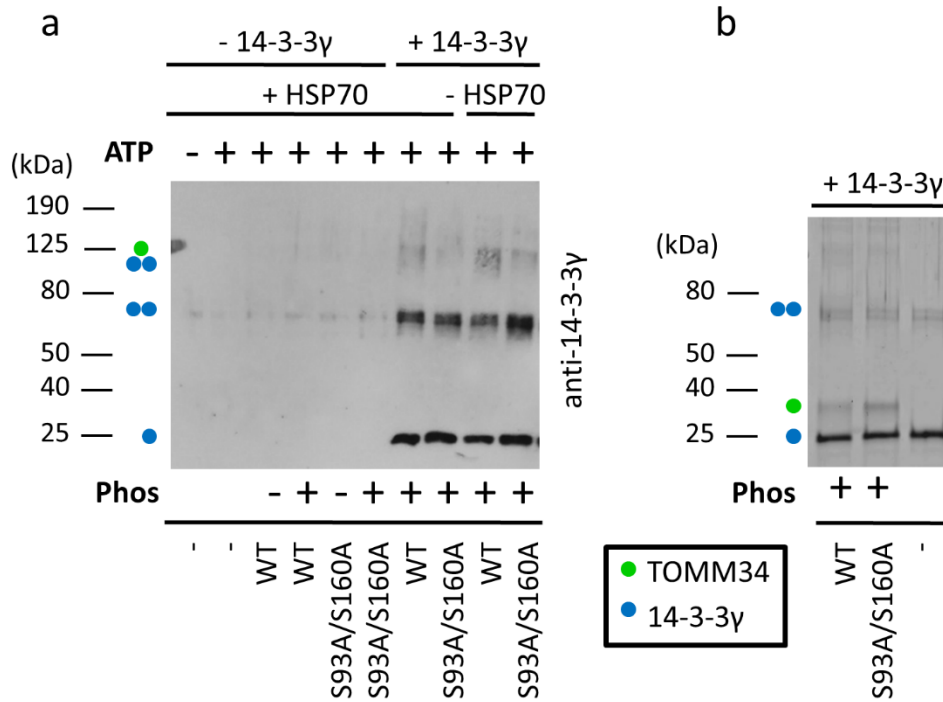

**Supplementary figure S5.** (a) Unmodified or PKA-phosphorylated WT or S93A/S160A TOMM34 forms (final concentration 60  $\mu$ M) proteins were mixed with 14-3-3 $\gamma$  (final concentration 120  $\mu$ M) or buffer. HSP70 protein (60  $\mu$ M) pre-incubated with or without ATP (0.4 mM) was added to the samples in 1:1 ratio and the mixture was chemically cross-linked by glutaraldehyde addition. The reactions were stopped after 20 min with Tris, pH 8 and separated by SDS-PAGE, blotted and probed with anti-14-3-3 antibody. Molecular weight markers and captured protein assemblies are indicated by numbers and dots, respectively. (b) Coomassie staining of pWT and p(S93A/S160A) forms of TOMM34 cross-linked to 14-3-3 $\gamma$  revealed clear separation of pWT, p(S93A/S160A) and 14-3-3 $\gamma$  monomers/dimers.

## Supplementary figure S6.

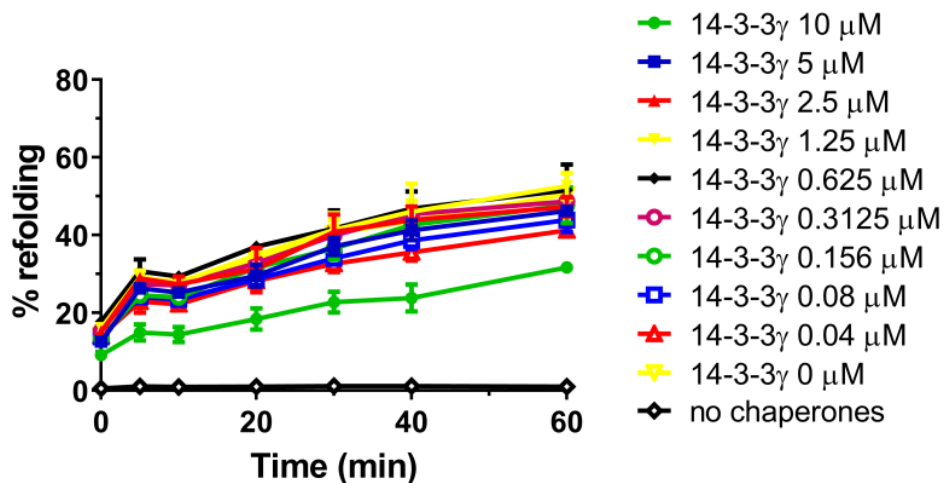

**Supplementary figure S6.** Firefly luciferase incubated with HSP70 (1 μM), HSP40 (2 μM), and BAG1 (0.5 μM) proteins was thermally denatured at 42 °C for 30 min in the presence of increasing concentration of 14-3-3γ dimers. The kinetics of luciferase reactivation was measured after shifting the reaction temperature to 37 °C. The signal from samples with native luciferase was set as 100%. As negative controls we measured the luciferase activity of denatured luciferase only (no chaperones, black line). Error bars represent S.D.; n = 3 independent experiments.

## References:

1. Blom, N., Gammeltoft, S., and Brunak, S. (1999) Sequence and structure-based prediction of eukaryotic protein phosphorylation sites. *J Mol Biol* **294**, 1351-1362
2. Madeira, F., Tinti, M., Murugesan, G., Berrett, E., Stafford, M., Toth, R., Cole, C., MacKintosh, C., and Barton, G. J. (2015) 14-3-3-Pred: improved methods to predict 14-3-3-binding phosphopeptides. *Bioinformatics* **31**, 2276-2283
